# Supplementary material for: Adaptive responses induced by 24S-hydroxycholesterol through liver X receptor pathway reduce 7-ketocholesterol-caused neuronal cell death
Source: PubMed Central journal article supplement — Redox Biol. 2013 Dec 4;2:28–35. doi: 10.1016/j.redox.2013.11.007 (PMC3871289; doi:10.1016/j.redox.2013.11.007), 2013-12-04
Supplement: mmc1.pdf [file mmc1.pdf]

## Figure S1

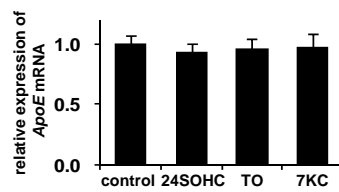

Figure S1. **Expression of *ApoE* mRNA in 24SOHC-treated SH-SY5Y cells.** The cells were treated as Fig. 5. *ApoE* mRNA levels were quantified by real-time PCR, and the relative expression levels are shown. Each bar represents mean  $\pm$  SD (n = 3).

## Figure S2

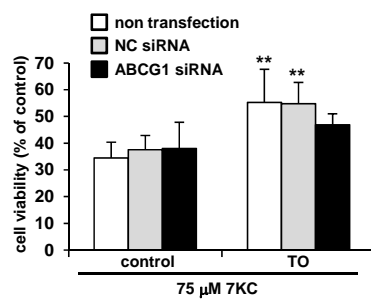

Figure S2. **Knockdown of ABCG1 reduces TO901317-induced adaptive response in SH-SY5Y cells.** SH-SY5Y cells were transfected with NC or ABCG1 siRNA and incubated for 24 h then treated with 5 μM TO901317 for 24 h. The cells were challenged with 75 μM 7KC for 24 h. The cell viability was measured by MTT assay. Each bar represents mean  $\pm$  SD (n = 3). \*\*, P < 0.01, when compared with vehicle control.
